# Supplementary material for: Getting off to a good start? Genetic evaluation of the ex situ conservation project of the Critically Endangered Montseny brook newt (Calotriton arnoldi)
Source: PeerJ. 2017 Jun 13;5:e3447. doi: 10.7717/peerj.3447 (PMC5472038; doi:10.7717/peerj.3447)
Supplement: Table S6 [file peerj-05-3447-s006.xlsx]

## Sheet: Full1
Code	SITE	Calarn02248		Ca3		Calarn29994		Ca21		Calarn37825		Calarn14961		Calarn15906		Calarn12022		Calarn06881		Ca7		Ca22		Calarn50748		CA8		Calarn36791		Calarn59202		Ca32		Calarn52354		Calarn30143		Calarn31321		Calarn15136		Calarn37884		US2		Us3		Us7
1	Eastern	193	197	253	253	173	173	240	244	235	247	213	213	113	121	226	226	166	174	224	224	134	134	209	213	184	192	128	136	224	224	189	193	224	224	198	230	181	185	173	173	260	260	227	235	159	163	234	246
2	Eastern	201	205	253	253	169	173	240	244	239	247	209	213	113	116	232	232	166	174	224	228	134	134	209	213	192	192	136	140	224	228	189	189	224	224	198	226	177	181	169	169	248	256	231	231	155	159	234	234
3	Eastern	193	197	253	257	173	173	244	244	251	251	209	213	113	113	226	226	166	166	232	236	134	134	209	213	192	200	136	144	224	224	189	189	224	240	190	226	181	185	169	173	248	260	227	231	159	159	234	234
4	Eastern	201	205	253	253	173	173	240	244	247	251	201	201	116	121	226	248	166	166	232	236	134	134	209	213	192	192	136	140	224	224	189	193	224	240	198	226	181	181	169	173	248	260	223	227	159	167	226	234
5	Eastern	201	205	253	253	173	173	240	240	231	247	201	213	113	116	226	232	166	166	232	232	134	134	209	213	192	196	136	136	224	224	185	189	224	224	198	226	181	185	165	169	260	260	227	231	159	163	234	234
6	Eastern	185	197	253	257	173	173	244	244	235	247	213	213	113	121	226	232	166	166	228	228	134	134	209	213	192	192	136	140	224	224	189	189	224	224	198	226	173	181	169	169	248	260	227	231	155	159	226	226
7	Eastern	197	201	253	253	173	173	240	244	247	251	201	213	116	121	224	232	162	166	228	228	134	134	209	209	196	200	128	144	224	224	185	197	224	224	226	226	177	185	169	169	248	256	227	231	159	159	234	234
8	Eastern	193	197	253	257	173	173	240	244	239	251	213	221	121	125	226	226	166	174	224	228	134	134	209	209	192	192	140	144	224	224	185	189	224	224	190	226	185	185	169	169	252	256	227	239	155	163	226	234
9	Eastern	197	201	253	253	169	173	244	244	247	251	213	221	113	121	226	232	166	166	224	224	134	134	209	209	192	192	136	144	224	232	185	189	224	224	190	226	181	181	169	173	248	260	227	227	155	163	234	234
10	Eastern	193	201	253	253	173	173	240	244	251	251	201	209	113	121	226	248	166	166	232	236	134	134	209	213	192	192	136	144	224	224	189	193	224	240	190	198	181	185	169	173	248	248	223	231	159	167	226	234
11	Eastern	201	205	253	257	173	173	244	244	247	251	201	201	121	125	226	226	162	166	228	232	134	134	213	213	192	192	140	140	224	224	185	189	224	224	226	226	181	189	165	169	248	260	227	227	159	167	234	234
12	Eastern	201	201	253	253	173	173	240	244	231	251	213	213	113	116	226	236	166	166	232	232	134	134	209	213	192	200	136	140	224	224	185	189	224	224	198	226	181	185	165	173	256	260	227	231	159	163	226	234
13	Eastern	193	197	253	257	173	173	240	244	247	251	209	213	113	116	226	236	166	166	232	236	134	134	213	217	192	200	136	144	224	224	185	189	224	240	226	226	181	189	169	173	256	260	227	231	159	159	234	234
14	Eastern	193	201	253	253	173	173	240	244	247	247	213	213	113	121	226	248	166	166	224	236	134	134	213	213	196	196	136	148	224	224	189	189	224	224	198	226	181	181	173	173	248	260	227	227	159	163	234	234
15	Eastern	193	201	249	253	173	173	240	244	247	247	213	213	113	113	226	226	162	174	224	236	134	134	209	213	196	196	136	136	224	224	189	189	224	224	198	198	177	185	173	173	248	260	227	227	159	163	226	234
16	Eastern	201	209	253	257	173	173	244	244	251	251	201	213	116	121	232	248	166	166	224	232	134	138	205	209	192	192	136	136	224	228	189	193	224	240	226	226	181	185	169	169	248	260	223	227	159	167	234	234
17	Eastern	193	201	253	253	173	173	240	244	247	247	213	213	113	113	226	248	162	174	224	236	134	134	213	213	196	196	136	148	224	224	189	189	224	224	198	198	181	181	173	173	248	260	227	235	159	159	234	234
18	Eastern	185	197	253	257	173	173	240	240	243	247	213	213	113	113	224	226	166	166	228	228	134	134	209	209	192	192	136	136	224	224	189	189	228	228	190	190	181	185	165	173	260	260	227	239	159	163	234	234
19	Eastern	201	201	253	257	173	173	244	244	247	251	201	201	116	121	232	248	162	166	224	232	134	134	209	209	192	208	140	144	224	224	189	193	224	240	198	226	173	181	169	169	248	260	223	231	159	167	234	234
20	Eastern	193	201	253	253	173	173	240	244	247	251	209	213	113	125	224	236	166	166	228	232	134	134	209	213	192	200	136	144	224	228	189	193	220	228	198	226	189	193	169	173	260	260	227	231	159	163	234	234
21	Eastern	193	201	253	253	169	173	240	244	235	247	213	213	121	121	226	248	162	166	224	228	134	134	213	213	196	196	136	136	224	224	189	189	224	224	198	226	181	185	173	173	260	260	227	235	159	163	226	234
22	Eastern	197	201	257	257	173	173	240	240	251	255	209	213	113	121	226	232	166	166	228	232	134	134	209	209	192	196	136	144	224	224	189	189	228	240	198	230	185	189	173	173	260	260	227	231	159	159	234	234
23	Eastern	201	205	253	253	173	173	240	240	247	251	201	213	113	116	232	236	162	166	232	232	134	134	209	209	192	192	136	144	224	224	185	185	224	224	226	226	181	181	165	173	256	260	231	231	163	163	226	234
24	Eastern	197	209	253	257	173	173	240	244	247	255	209	213	113	113	224	226	166	166	232	232	134	134	205	209	196	196	136	140	224	224	189	189	224	224	190	198	185	189	173	173	248	248	227	231	159	159	226	234
25	Eastern	193	201	249	253	173	173	244	244	247	247	213	213	113	121	226	226	166	166	224	228	134	134	213	213	188	192	128	136	224	240	189	189	224	224	198	226	177	181	169	173	248	260	227	227	159	159	226	234
26	Eastern	201	205	253	257	173	173	244	244	247	251	213	213	121	125	226	226	166	174	228	228	134	134	209	213	192	192	136	140	224	224	189	193	228	228	198	230	181	189	169	169	248	260	227	231	159	159	226	234
27	Western	173	173	241	245	181	185	232	236	211	239	209	209	108	108	236	240	178	186	236	240	126	138	213	213	184	184	128	128	212	216	193	193	224	228	230	230	152	152	173	173	244	244	231	231	143	143	246	246
28	Western	173	173	237	245	177	181	232	236	231	235	213	217	108	108	240	240	174	182	236	240	126	138	213	217	180	184	124	128	228	228	193	193	224	228	230	230	152	161	173	173	240	244	227	227	143	143	246	246
29	Western	173	177	233	237	177	181	232	236	211	215	209	213	108	108	236	236	174	182	236	240	126	138	217	217	184	184	128	132	216	216	193	193	228	232	230	230	152	152	173	173	244	244	227	235	143	143	246	246
30	Western	173	173	245	245	177	181	232	236	231	235	213	217	108	113	240	240	182	182	236	240	126	138	213	213	180	184	128	128	216	228	193	193	228	228	222	230	152	161	173	173	244	244	227	227	143	143	246	246
31	Western	173	173	233	237	177	181	232	236	215	235	209	213	108	108	236	240	174	182	236	240	126	138	213	217	184	184	128	132	216	220	193	193	228	232	230	230	152	152	173	173	244	244	227	231	143	143	246	246
32	Western	173	173	237	237	181	185	232	236	215	239	209	213	108	108	240	240	178	182	236	240	126	138	213	217	184	184	128	128	212	216	193	193	228	232	230	230	152	152	165	173	244	244	227	231	143	143	246	246
33	Western	169	169	237	241	177	181	236	240	223	231	209	213	108	108	224	240	182	182	240	240	138	138	213	217	184	184	124	128	212	216	193	193	224	224	230	230	152	152	173	173	244	244	219	227	143	143	246	246
34	Western	173	177	237	237	181	181	232	236	215	215	213	213	108	108	236	240	182	182	236	240	126	126	213	217	184	184	128	128	216	220	193	193	224	228	230	230	152	152	173	173	244	244	227	227	143	143	246	246
35	Western	173	173	237	245	177	185	232	236	239	239	209	209	108	108	236	240	178	182	236	240	126	138	213	217	184	184	128	128	212	212	193	193	228	232	230	230	152	152	165	173	244	244	231	231	143	143	246	246
36	Western	169	173	233	237	177	177	232	236	239	239	209	213	108	108	240	240	174	182	232	240	126	146	213	213	184	188	128	132	212	216	193	193	224	232	230	230	152	152	173	173	244	244	231	231	143	143	246	246
37	Western	173	173	233	245	177	177	232	232	211	235	209	209	108	108	236	240	174	174	240	240	126	138	213	217	184	184	132	132	216	216	193	193	228	232	226	230	152	152	165	173	244	244	231	235	143	143	246	246
38	Western	173	173	241	245	181	181	232	232	239	239	209	213	108	108	236	240	182	182	240	240	126	126	217	217	184	184	124	124	216	228	193	193	224	228	230	230	152	152	165	173	244	244	227	235	143	143	246	246
39	Western	173	173	241	245	177	177	236	236	215	239	213	217	108	108	224	244	178	182	240	240	126	126	209	213	180	188	124	128	216	216	193	197	224	228	222	230	148	157	165	177	244	244	227	231	143	143	246	246
40	Western	173	173	237	245	177	181	232	236	215	239	213	213	108	108	240	240	178	182	240	240	126	126	213	217	184	184	124	128	212	228	193	197	224	228	230	230	148	152	173	177	244	244	227	235	143	143	246	246
41	Western	173	173	241	245	177	177	232	232	215	235	213	213	108	108	224	236	182	182	236	236	126	138	217	217	184	184	124	132	216	228	193	193	228	232	230	230	152	152	173	173	244	244	227	227	143	143	246	246
42	Western	173	173	237	241	177	181	232	236	231	235	209	209	108	108	236	244	178	182	236	240	126	126	209	213	180	184	128	128	216	216	193	193	228	228	230	230	152	157	173	173	244	244	219	227	143	143	246	246
